# Supplementary material for: A G-quadruplex based platform for label-free monitoring of DNA reaction kinetics
Source: Royal Society of Chemistry journal article supplement (doi:10.1039/c4an01569j), 2014-01-01
Supplement: c4an01569j1.pdf [file c4an01569j1.pdf]

## Supporting Information

### **A G-quadruplex based platform for label-free monitoring of DNA reaction kinetics**

*Ji Nie, Liang-Yuan Cai, Fang-Ting Zhang, Ming-Zhe Zhao, Ying-Lin Zhou,\* Xin-  
Xiang Zhang\**

Beijing National Laboratory for Molecular Sciences (BNLMS), Key Laboratory of  
Bioorganic Chemistry and Molecular Engineering of Ministry of Education, College  
of Chemistry, Peking University, Beijing 100871, China

Table S1 DNA sequences used in this work

| Name      | Sequence (5'- to 3'-)                                                |
|-----------|----------------------------------------------------------------------|
| X'-Y'     | TCCCTCCCTCCCTCCCAGTCCAGACTCTAACTATAACAACCTACTACCTCAA-P               |
| Y'-Y'     | TCCCTCCCTCCCTCCCAGTCCAGACTCTTCCCTCCCTCCCTCCCAGA-P                    |
| X'-Y'-A10 | AAAAAAAAAATCCCTCCCTCCCTCCCAGTCCAGACTCTAACTATAACAACCTACTACCTCAA<br>-P |
| X'-Y'-A5  | AAAAATCCCTCCCTCCCTCCCAGTCCAGACTCTAACTATAACAACCTACTACCTCAA-P          |
| Target X  | TGAGGTAGTAGGTTGTATAGTT                                               |
| EAD2      | CTGGGAGGGAGGGAGGGA                                                   |
| EAD2-T5   | CTGGGAGGGAGGGAGGGATTTTT                                              |
| EAD2-T10  | CTGGGAGGGAGGGAGGGATTTTTTTTTT                                         |

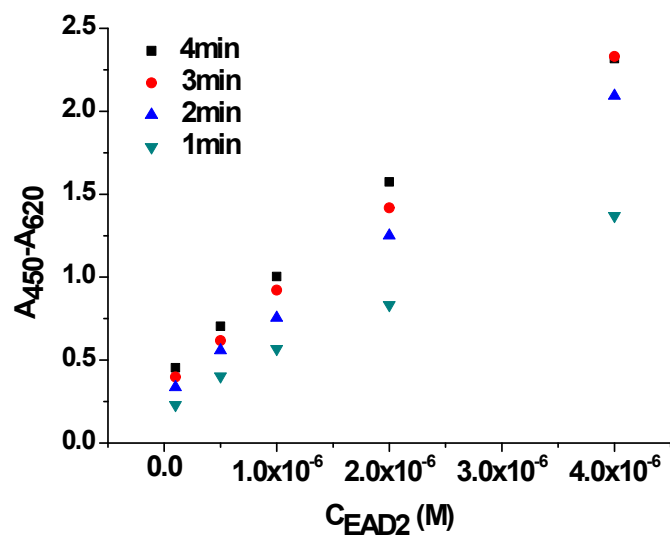

Figure S1 The optimization of coloration time for EAD2/hemin DNAzyme catalyzed TMB-H<sub>2</sub>O<sub>2</sub> colorimetry: calibration curves of ( $A_{450} - A_{620}$ ) vs. EAD2 concentration at different coloration time.

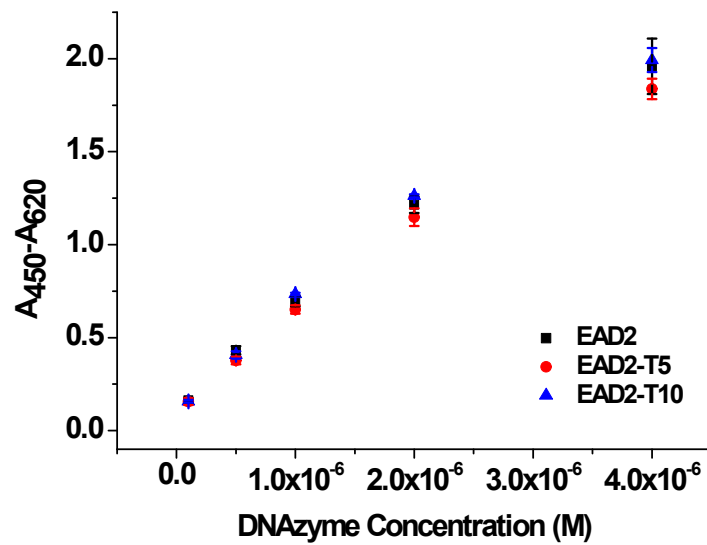

Figure 2S The comparison of DNAzyme catalytic activity of EAD2, EAD2-T5, EAD2-T10 in the presence of hemin.
